# Supplementary material for: Large-scale features of Last Interglacial climate: results from evaluating the lig127k simulations for the Coupled Model Intercomparison Project (CMIP6)–Paleoclimate Modeling Intercomparison Project (PMIP4)
Source: Copernicus journal article supplement (doi:10.5194/cp-17-63-2021), 2021-01-11
Supplement: Supplementary file 1 [file cp-17-63-2021-supplement.zip]

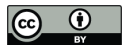

## *Supplement of*

# **Large-scale features of Last Interglacial climate: results from evaluating the *lig127k* simulations for the Coupled Model Intercomparison Project (CMIP6)–Paleoclimate Modeling Intercomparison Project (PMIP4)**

**Bette L. Otto-Bliesner et al.**

*Correspondence to:* Bette Otto-Bliesner (ottobli@ucar.edu)

- cp-17-63-2021-supplement-title-page.pdf
- SI\_CP-2019-174\_20210105
  - SI\_Figures-Table S1\_CP-2019-174\_20210105.docx
  - Table S2. Annual - NH Oceans, Europe, and Greenland (40-90N)\_CP-2019-174.xlsx
  - Table S3. Annual - Low latitudes (40S-40N)\_CP-2019-174.xlsx
  - Table S4. Annual - SH Oceans and Antarctica (40-90S)\_CP-2019-174.xlsx
  - Table S5. JJA - NH Oceans (40-90N) JJA\_CP-2019-174.xlsx
  - Table S6. JJA - NH terrestrial (40-90N) JJA\_\_CP-2019-174.xlsx
- \_\_MACOSX
  - SI\_CP-2019-174\_20210105
    - \* .\_SI\_Figures-Table S1\_CP-2019-174\_20210105.docx
    - \* .\_Table S2. Annual - NH Oceans, Europe, and Greenland (40-90N)\_CP-2019-174.xlsx
    - \* .\_Table S3. Annual - Low latitudes (40S-40N)\_CP-2019-174.xlsx
    - \* .\_Table S4. Annual - SH Oceans and Antarctica (40-90S)\_CP-2019-174.xlsx
    - \* .\_Table S5. JJA - NH Oceans (40-90N) JJA\_CP-2019-174.xlsx
    - \* .\_Table S6. JJA - NH terrestrial (40-90N) JJA\_\_CP-2019-174.xlsx

The copyright of individual parts of the supplement might differ from the CC BY 4.0 License.
