# Supplementary material for: Large-scale features of Last Interglacial climate: results from evaluating the lig127k simulations for the Coupled Model Intercomparison Project (CMIP6)–Paleoclimate Modeling Intercomparison Project (PMIP4)
Source: Copernicus journal article supplement (doi:10.5194/cp-17-63-2021), 2021-01-11
Supplement: Supplementary file 1 [file SI_Figures-Table S1_CP-2019-174_20210105.docx]

*Supplement of*

**Large-scale features of Last Interglacial climate: results from evaluating the lig127k simulations for the Coupled Model Intercomparison Project (CMIP6)–Paleoclimate Modeling Intercomparison Project (PMIP4)**

**Bette L. Otto-Bliesner et al.**

*Correspondence to:* Bette L. Otto-Bliesner (ottobli@ucar.edu)

**Figure S1.** The observed 15% concentration boundaries for the 2000-2018 and 1870-1919 CE intervals for August-September in the NH and February-March in the SH based on the Hadley Centre Sea Ice and Sea Surface Temperature (HadISST; Rayner et al., 2003) data set.

**Figure S2.** The *piControl* sea ice concentration in the Northern Hemisphere for August-September for the individual models included in Figures 3, 4, 6, and 7.

**Figure S3.** The *lig127k* sea ice concentration in the Northern Hemisphere for August-September for the individual models included in Figures 3, 4, 6, and 7.

**Figure S4.** Same as Figure S2 but for the Southern Hemisphere for February-March.

**Figure S5.** Same as Figure S4 but for the Southern Hemisphere for February-March.

**Table S1. Details of models included. Should the hyperlinks in the table not work, the web**

**address can be created manually by adding https://doi.org/ in front of each doi.**

| **Climate Model** | **lig127k years** | **piControl years** | **Digital Object Identifier (doi) for**  **lig127k and piControl simulations** |
| --- | --- | --- | --- |
| ACCESS-ESM1-5 | 1001-1100 | 901-1000 | [10.22033/ESGF/CMIP6.13703](http://doi.org/10.22033/ESGF/CMIP6.13703)  [10.22033/ESGF/CMIP6.4312](http://doi.org/10.22033/ESGF/CMIP6.4312) |
| AWI-ESM-1-1-LR | 3001-3100 | 1855-1954 | [10.22033/ESGF/CMIP6.9331](http://doi.org/10.22033/ESGF/CMIP6.9331)  [10.22033/ESGF/CMIP6.9335](http://doi.org/10.22033/ESGF/CMIP6.9335) |
| AWI-ESM-2-1-LR | 3400-3499 | 3000-3099 | **N/A**  **N/A** |
| CESM2 | 601-700 | 1100-1200 | [10.22033/ESGF/CMIP6.7673](http://doi.org/10.22033/ESGF/CMIP6.7673)  [10.22033/ESGF/CMIP6.7733](http://doi.org/10.22033/ESGF/CMIP6.7733) |
| CNRM-CM6-1 | 2050-2149 | 2050-2149 | [10.22033/ESGF/CMIP6.4118](http://doi.org/10.22033/ESGF/CMIP6.4118)  [10.22033/ESGF/CMIP6.4163](http://doi.org/10.22033/ESGF/CMIP6.4163) |
| EC-Earth3-LR | 2320-2419 | 2350-2449 | [10.22033/ESGF/CMIP6.4798](http://doi.org/10.22033/ESGF/CMIP6.4798)  [10.22033/ESGF/CMIP6.4847](http://doi.org/10.22033/ESGF/CMIP6.4847) |
| FGOALS-f3-L | 1100-1199 | 1000-1099 | [10.22033/ESGF/CMIP6.12013](http://doi.org/10.22033/ESGF/CMIP6.12013)  [10.22033/ESGF/CMIP6.3447](http://doi.org/10.22033/ESGF/CMIP6.3447) |
| FGOALS-g3 | 1150-1249 | 0800-0899 | [10.22033/ESGF/CMIP6.3407](http://doi.org/10.22033/ESGF/CMIP6.3407)  [10.22033/ESGF/CMIP6.3448](http://doi.org/10.22033/ESGF/CMIP6.3448) |
| GISS-E2-1-G | 2900-2999 | 2900-2999 | [10.22033/ESGF/CMIP6.7223](http://doi.org/10.22033/ESGF/CMIP6.7223)  [10.22033/ESGF/CMIP6.7380](http://doi.org/10.22033/ESGF/CMIP6.7380) |
| HadGEM3-GC31-LL | 1999-2049 | 1999-2049 | **N/A**  [10.22033/ESGF/CMIP6.6294](http://doi.org/10.22033/ESGF/CMIP6.6294) |
| INM-CM4-8 | 1900-1999 | 1950-2049 | [10.22033/ESGF/CMIP6.5076](http://doi.org/10.22033/ESGF/CMIP6.5076)  [10.22033/ESGF/CMIP6.5080](http://doi.org/10.22033/ESGF/CMIP6.5080) |
| IPSL-CM6A-LR | 2250-2349 | 2250-2349 | [10.22033/ESGF/CMIP6.5228](http://doi.org/10.22033/ESGF/CMIP6.5228)  [10.22033/ESGF/CMIP6.5251](http://doi.org/10.22033/ESGF/CMIP6.5251) |
| MIROC-ES2L | 3300-3399 | 2250-2349 | [10.22033/ESGF/CMIP6.5645](http://doi.org/10.22033/ESGF/CMIP6.5645)  [10.22033/ESGF/CMIP6.5710](http://doi.org/10.22033/ESGF/CMIP6.5710) |
| MPI-ESM1-2-LR | 2050-2149 | 2750-2849 | **N/A**  **N/A** |
| NESM3 | 1600-1699 | 0900-0999 | [10.22033/ESGF/CMIP6.8772](http://doi.org/10.22033/ESGF/CMIP6.8772)  [10.22033/ESGF/CMIP6.8776](http://doi.org/10.22033/ESGF/CMIP6.8776) |
| NorESM1-F | 1601-1700 | 1601-1700 | [10.22033/ESGF/CMIP6.11590](http://doi.org/10.22033/ESGF/CMIP6.11590)  [10.22033/ESGF/CMIP6.11595](http://doi.org/10.22033/ESGF/CMIP6.11595) |
| NorESM2-LM | 2101-2200 | 2001-2100 | [10.22033/ESGF/CMIP6.8078](http://doi.org/10.22033/ESGF/CMIP6.8078)  [10.22033/ESGF/CMIP6.8217](http://doi.org/10.22033/ESGF/CMIP6.8217) |

**Excel files with data and model values for Figs. 10-12.**

**Table S2. Annual - North Atlantic and Pacific SST (40-90°N) and Greenland**

**Table S3. Annual - Low latitudes (40°S-40°N)**

**Table S4. Annual - SH Oceans and Antarctica (40-90°S)**

**Table S5. JJA - NH Oceans (40-90°N)**

**Table S6. JJA - NH Terrestrial (40-90°N)**

**Table S7. DJF - SH Oceans (40-90°S)**

**Additional References for Supplementary Information**

Axford, Y., Briner, J.P., Francis, D.R., Miller, G.H., Walker, I.R. and Wolfe, A.P. : Chironomids record terrestrial temperatures throughout Arctic interglacials of the past 200,000 yr, Geol Soc of America Bull, 123(7/8), 1275-1287, 2011.

Bigelow, N.H., Edwards, M.E., Elias, S.A., Hamilton, T.D. and Schweger, C.E.: Tundra and boreal forest of interior Alaska during terminal MIS 6 and MIS 5e, Veget Hist Archaeobot, 23, 177-193, 2014.

Boucher, O., Denvil, S., Caubel, A., Foujols, M. A.: *IPSL IPSL-CM6A-LR model output prepared for CMIP6 PMIP lig127k*. Version 20180926, Earth System Grid Federation, <https://doi.org/10.22033/ESGF/CMIP6.5228>, 2018a.

Boucher, O., Denvil, S., Caubel, A., Foujols, M. A.:*IPSL IPSL-CM6A-LR model output prepared for CMIP6 CMIP piControl*, Version 20190319, Earth System Grid Federation, <https://doi.org/10.22033/ESGF/CMIP6.5251>, 2018b.

Cao, J.: *NUIST NESMv3 model output prepared for CMIP6 PMIP lig127k*, Version 20190909, Earth System Grid Federation, <https://doi.org/10.22033/ESGF/CMIP6.8772>, 2019a.

Cao, J., Wang, B.:*NUIST NESMv3 model output prepared for CMIP6 CMIP piControl*, Version 20190708, Earth System Grid Federation, <https://doi.org/10.22033/ESGF/CMIP6.8776>, 2019b.

Danabasoglu, G.:*NCAR CESM2 model output prepared for CMIP6 PMIP lig127k*, Version 20190923, Earth System Grid Federation, <https://doi.org/10.22033/ESGF/CMIP6.7673>, 2019a.

Danabasoglu, G., Lawrence, D., Lindsay, K., Lipscomb, W., Strand, G.:*NCAR CESM2 model output prepared for CMIP6 CMIP piControl*, Version 20190320, Earth System Grid Federation, <https://doi.org/10.22033/ESGF/CMIP6.7733>, 2019b.

Danek, C., Shi, X., Stepanek, C., Yang, H., Barbi, D., Hegewald, J., Lohmann, G.:*AWI AWI-ESM1.1LR model output prepared for CMIP6 CMIP piControl*, Version 20200212, Earth System Grid Federation, <https://doi.org/10.22033/ESGF/CMIP6.9335>, 2020.

EC-Earth Consortium (EC-Earth):*EC-Earth-Consortium EC-Earth3-LR model output prepared for CMIP6 PMIP lig127k*, Version 20200409, Earth System Grid Federation, 2020

EC-Earth Consortium (EC-Earth):*EC-Earth-Consortium EC-Earth3-LR model output prepared for CMIP6 CMIP piControl*, Version 20200409, Earth System Grid Federation, <https://doi.org/10.22033/ESGF/CMIP6.4847>, 2019.

Francis, D.R., Wolfe, A.P., Walker, I.R. and Miller, G.H.: Interglacial and Holocene temperature reconstructions based on midge remains in sediments of two lakes from Baffin Island, Nunavut, Arctic Canada, Palaeogeography, Palaeoclimatology, Palaeoecology 236, 107–124, 2006.

Fréchette, B., Wolfe, A.P., Miller, G.H., Richard, P.J.H. and de Vernal, A.: Vegetation and climate of the last interglacial on Baffin Island, Arctic Canada, Palaeogeography, Palaeoclimatology, Palaeoecology, 236, 91–106, 2006.

Guo, C., Bentsen, M., Bethke, I., Ilicak, M., Tjiputra, J., Toniazzo, T., Schwinger, J., Otterå, O. H.:*NCC NorESM1-F model output prepared for CMIP6 PMIP lig127k*, Version 20190920, Earth System Grid Federation, <https://doi.org/10.22033/ESGF/CMIP6.11590>, 2019a.

Guo, C., Bentsen, M., Bethke, I., Ilicak, M., Tjiputra, J., Toniazzo, T., Schwinger, J., Otterå, O. H.:*NCC NorESM1-F model output prepared for CMIP6 CMIP piControl*, Version 20190920, Earth System Grid Federation, <https://doi.org/10.22033/ESGF/CMIP6.11595>, 2019b.

Hajima, T., Abe, M., Arakawa, O., Suzuki, T., Komuro, Y., Ogura, T., Ogochi, K., Watanabe, M., Yamamoto, A., Tatebe, H., Noguchi, M. A., Ohgaito, R., Ito, A., Yamazaki, D., Ito, A., Takata, K., Watanabe, S., Kawamiya, M., Tachiiri, K.:*MIROC MIROC-ES2L model output prepared for CMIP6 CMIP piControl*, Version 20190823, Earth System Grid Federation, <https://doi.org/10.22033/ESGF/CMIP6.5710>, 2019.

Li, L.:*CAS FGOALS-g3 model output prepared for CMIP6 CMIP piControl*, Version 20190818, Earth System Grid Federation, <https://doi.org/10.22033/ESGF/CMIP6.3448>, 2019.

McFarlin, J.M., Axford, Y., Osburn, M.R., Kelly, M.A., Osterberg, E.C. and Farnsworth, L.B.: Pronounced summer warming in northwest Greenland during the Holocene and Last Interglacial. Proc Natl Acad Sci USA, 115, 6357-6362, 2018.

Melles, M. Brigham-Grette, J., Minyuk, P.S., Nowaczyk, N.R., Wennrich, V., DeConto, R.M., Anderson, P.M., Andreev, A.A., Coletti, A., Cook, T.L., Haltia-Hovi, E., Kukkonen, M., Lozhkin, A.V., Rosen, P., Tarasov, P., Vogel, H. and Wagner, B.: 2.8 million years of arctic climate change from Lake El’gygytgyn, NE Russia, Science, 337, 315-320, 2012.

NASA Goddard Institute for Space Studies (NASA/GISS):*NASA-GISS GISS-E2.1G model output prepared for CMIP6 CMIP piControl*, Version 20190710, Earth System Grid Federation, <https://doi.org/10.22033/ESGF/CMIP6.7380>, 2018.

NASA Goddard Institute for Space Studies (NASA/GISS):*NASA-GISS GISS-E2.1G model output prepared for CMIP6 PMIP lig127k*, Version 20190916, Earth System Grid Federation, <https://doi.org/10.22033/ESGF/CMIP6.7223>, 2019.

O'ishi, R., Abe-Ouchi, A., Ohgaito, R., Abe, M., Arakawa, O., Ogochi, K., Hajima, T., Watanabe, M., Yamamoto, A., Tatebe, H., Noguchi, M. A., Ito, A., Yamazaki, D., Ito, A., Takata, K., Watanabe, S., Kawamiya, M., Tachiiri, K.:*MIROC MIROC-ES2L model output prepared for CMIP6 PMIP lig127k*, Version 20191118, Earth System Grid Federation, <https://doi.org/10.22033/ESGF/CMIP6.5645>, 2019.

Plikk, A., Engels, S., Luoto, T.P., Nazarova, L., Salonen, J.S. and Helmens, K.F.: Chironomid-based temperature reconstruction for the Eemian Interglacial (MIS 5e) at Sokli, northeast Finland, J Paleolimnol, 61, 355–371, 2019.

Ridley, J., Menary, M., Kuhlbrodt, T., Andrews, M., Andrews, Tim:*MOHC HadGEM3-GC31-LL model output prepared for CMIP6 CMIP piControl*, Version 20190628, Earth System Grid Federation, <https://doi.org/10.22033/ESGF/CMIP6.6294>, 2018.

Salonen, J.S., Helmens, K.F., Brendryen, J., Kuosmanen, N., Valiranta, M., Goring, S., Korpela, M., Kylander, M., Philip, A., Plikk, A., Renssen, H. and Luoto, M.: Abrupt high-latitude climate events and decoupled seasonal trends during the Eemian, Nature Communications 9, 2851, 2018.

Seland, Ø., Bentsen, M., Oliviè, D. J. L., Toniazzo, T., Gjermundsen, A., Graff, L. S.,; Debernard, J. B., Gupta, A. K., He, Y., Kirkevåg, A., Schwinger, J., Tjiputra, J., Aas, K. S., Bethke, I., Fan, Y., Griesfeller, J., Grini, A., Guo, C., Ilicak, M., Karset, I. H. H., Landgren, O. A., Liakka, J., Moseid, K. O., Nummelin, A., Spensberger, C., Tang, H., Zhang, Z., Heinze, C., Iversen, T., Schulz, M.:*NCC NorESM2-LM model output prepared for CMIP6 CMIP piControl*, Version 20190920, Earth System Grid Federation, <https://doi.org/10.22033/ESGF/CMIP6.8217>, 2019.

Shi, Xiaoxu; Yang, Hu; Danek, Christopher; Lohmann, Gerrit:*AWI AWI-ESM1.1LR model output prepared for CMIP6 PMIP lig127k*, Version 20200212, Earth System Grid Federation, <https://doi.org/10.22033/ESGF/CMIP6.9331>, 2020.

Voldoire, A.:*CNRM-CERFACS CNRM-CM6-1 model output prepared for CMIP6 PMIP lig127k*, Version 20200212, Earth System Grid Federation, <https://doi.org/10.22033/ESGF/CMIP6.4118>, 2020.

Voldoire, A.:*CMIP6 simulations of the CNRM-CERFACS based on CNRM-CM6-1 model for CMIP experiment piControl*, Version 20180814, Earth System Grid Federation, <https://doi.org/10.22033/ESGF/CMIP6.4163>, 2018.

Volodin, E., Mortikov, E., Gritsun, A., Lykossov, V., Galin, V., Diansky, N., Gusev, A., Kostrykin, S., Iakovlev, N., Shestakova, A., Emelina, S.:*INM INM-CM4-8 model output prepared for CMIP6 PMIP lig127k*, Version 20190802, Earth System Grid Federation, <https://doi.org/10.22033/ESGF/CMIP6.5076>, 2019a.

Volodin, E., Mortikov, E., Gritsun, A., Lykossov, V., Galin, V., Diansky, N., Gusev, A., Kostrykin, S., Iakovlev, N., Shestakova, A., Emelina, S.:*INM INM-CM4-8 model output prepared for CMIP6 CMIP piControl*, Version 20190605, Earth System Grid Federation, <https://doi.org/10.22033/ESGF/CMIP6.5080>, 2019b.

Yeung, N., Menviel, L., Meissner, K., Ziehn, T., Chamberlain, M., Mackallah, C., Druken, K., Ridzwan, S. M.:*CSIRO ACCESS-ESM1.5 model output prepared for CMIP6 PMIP lig127k*, Version 20191206, Earth System Grid Federation, <https://doi.org/10.22033/ESGF/CMIP6.13703>, 2019.

Yu, Y.:*CAS FGOALS-f3-L model output prepared for CMIP6 CMIP piControl*, Version 20191029, Earth System Grid Federation, <https://doi.org/10.22033/ESGF/CMIP6.3447>, 2019.

Zhang, Z., Bentsen, M., Oliviè, D. Jan. L., Seland, Ø., Toniazzo, T., Gjermundsen, A., Graff, L. S., Debernard, J. B., Gupta, A. K., He, Y., Kirkevåg, A., Schwinger, J., Tjiputra, J., Aas, K. S., Bethke, I., Fan, Y., Griesfeller, J., Grini, A., Guo, C., Ilicak, M., Karset, I. H. H., Landgren, Oskar A., Liakka, J., Moseid, K, O., Nummelin, A., Spensberger, C., Tang, H., Heinze, C., Iversen, T., Schulz, M.:*NCC NorESM2-LM model output prepared for CMIP6 PMIP lig127k*, Version 20191108 , Earth System Grid Federation, <https://doi.org/10.22033/ESGF/CMIP6.8078>, 2019.

Zheng, W., He, B.:*CAS FGOALS-f3-L model output prepared for CMIP6 PMIP lig127k*, Version 20191025, Earth System Grid Federation, <https://doi.org/10.22033/ESGF/CMIP6.12013>, 2019a.

Zheng, W, Dong, L:*CAS FGOALS-g3 model output prepared for CMIP6 PMIP lig127k*, Version 20191030, Earth System Grid Federation, <https://doi.org/10.22033/ESGF/CMIP6.3407>, 2019b.

Ziehn, T., Chamberlain, M., Lenton, A., Law, R., Bodman, R., Dix, M., Wang, Y., Dobrohotoff, P., Srbinovsky, J., Stevens, L., Vohralik, P., Mackallah, C., Sullivan, A., O'Farrell, S., Druken, K.:*CSIRO ACCESS-ESM1.5 model output prepared for CMIP6 CMIP piControl*, Version 20200409, Earth System Grid Federation, <https://doi.org/10.22033/ESGF/CMIP6.4312>, 2019.
