# Supplementary material for: Large-scale features of Last Interglacial climate: results from evaluating the lig127k simulations for the Coupled Model Intercomparison Project (CMIP6)–Paleoclimate Modeling Intercomparison Project (PMIP4)
Source: Copernicus journal article supplement (doi:10.5194/cp-17-63-2021), 2021-01-11
Supplement: Supplementary file 2 [file Table S2. Annual - NH Oceans, Europe, and Greenland (40-90N)_CP-2019-174.xlsx]

## Sheet: Sheet1
	Table S2. Annual - North Atlantic and Pacific SST (40-90N) and Greenland
Compilation reference	Site Name	Location	Latitude	Longitude	Proxy	Anom-2SD	Anom-1SD	Anom	Anom+1SD	Anom+2SD		ACCESS-ESM1-5	AWI-ESM-1-1-LR	AWI-ESM-2-1-LR	CESM2	CNRM-CM6-1	EC-Earth3-LR	FGOALS-f3-L	FGOALS-g3	GISS-E2-1-G	HadGEM3-GC31-LL	INM-CM4-8	IPSL-CM6A-LR	MIROC-ES2L	MPI-ESM1-2-LR	NESM3	NorESM1-F	NorESM2-LM	MMM
Capron et al. 2017	NEEM	Greenland	77.49	-51.2	Water isotopes	-0.5	3.4	7.3	11.2	15.1		2.14552	-0.270564	0.284079	0.979036	2.09062	4.16496	0.156177	1.53376	0.211836	2.5557	0.930866	0.497595	0.412323	0.425667	0.813579	0.483711	1.28633	1.10007
Capron et al. 2017	SU90-08_Alk	North Atlantic	43.35	-30.41	Alkenones	0.5	1.85	3.2	4.55	5.9		0.844485	0.591405	-0.174862	-0.889663	0.873272	0.881321	-0.375337	0.423663	0.238259	0.107041	-0.745347	-0.512956	-0.415421	-0.133172	0.193634	0.126296	-0.0590372	0.0572694
Hoffman et al. 2017	M23323	North Atlantic	67.77	5.92	Alkenones	-7.0792	-5.284	-3.48881	0.0219141	3.53264		1.61035	-1.56948	0.0265098	0.36739	0.899951	5.10793	-0.228685	1.3954	1.15502	2.20013	0.16841	0.0205103	-0.0700966	-0.0715349	-2.55724	0.0108301	-0.31292	0.479557
Hoffman et al. 2017	V28-14	North Atlantic	64.78	-29.57	Forams	-2.75383	-0.231236	2.29136	3.82906	5.36676		4.61982	-0.560265	0.323709	0.984077	1.39276	6.43213	0.258418	1.16553	0.573869	2.62727	0.528587	-0.226618	0.183719	0.0684257	1.8324	0.0439127	0.780353	1.23695
Hoffman et al. 2017	V27-20	North Atlantic	54	-46.2	Forams	0.885149	2.22587	3.56659	4.75192	5.93724		4.42711	-0.04379	-0.512982	0.80853	1.23631	9.16289	-0.258545	2.04796	-0.00141803	2.06184	-1.14229	-1.83672	-0.286962	-0.0757744	0.575298	-0.434803	0.260866	0.940443
Hoffman et al. 2017	M23414-9	North Atlantic	53.53	-20.29	Forams	-6.28319	-3.05972	0.163743	1.21712	2.2705		2.04938	0.733477	-0.79562	-0.197142	0.697927	3.09753	-0.0422645	0.565341	0.0825225	1.00508	-0.2748	-0.965304	-0.546537	-0.36363	-0.510439	-0.342932	-0.529866	0.215454
Hoffman et al. 2017	V23-82	North Atlantic	52.58	-21.93	Forams	-9.11186	-5.81313	-2.5144	-0.682761	1.14888		1.90375	1.08244	-0.900459	-0.392776	0.65514	2.78115	0.0651738	0.592595	0.0693119	0.846009	-0.406713	-0.935781	-0.589157	-0.372081	-0.325267	-0.26797	-0.655746	0.185272
Hoffman et al. 2017	K708-1	North Atlantic	50	-23.74	Forams	-4.5754	-2.01431	0.546781	2.11257	3.67836		1.53594	0.970513	-0.874463	-0.704196	0.592389	2.33517	0.218629	0.615777	0.0601467	0.570875	-0.964636	-0.920427	-0.593172	-0.312097	-0.00477194	-0.294316	-0.811464	0.0835232
Hoffman et al. 2017	V29-179	North Atlantic	44	-23.51	Forams	-5.5564	-2.73913	0.078146	1.74658	3.41502		0.75908	0.506413	-0.247172	-0.675245	0.74746	2.01679	-0.234078	0.394515	0.213892	0.463213	-0.729262	-0.512785	-0.374727	-0.116989	0.0346616	-0.029784	-0.213178	0.117812
Hoffman et al. 2017	Y7211-1	North Pacific	43.25	-126.38	Radiolaria	-8.34842	-5.67638	-3.00433	-0.938209	1.12791		1.11932	-0.688338	-0.287317	-0.382158	0.768638	0.468003	-0.393866	0.458548	0.288807	0.772971	-0.211346	0.0328415	-0.110995	-0.0152888	0.36157	-0.0800655	0.205648	0.135704
Hoffman et al. 2017	D-117	North Atlantic	42.1	-52.75	Forams	-1.2908	0.0497296	1.39026	2.67635	3.96243		-0.0160666	-0.95175	-0.229449	-0.96521	0.766487	0.346433	-0.885273	0.928654	0.00908473	0.606796	-1.42193	0.00407507	-0.869605	-0.937213	0.708717	-0.739262	-0.723458	-0.256998
Hoffman et al. 2017	V30-97	North Atlantic	41	-32.93	Forams	-3.96985	-2.43036	-0.890865	0.408739	1.70834		0.95191	0.285863	-0.221438	-0.709466	0.968478	0.665821	-0.438869	0.352723	0.323822	0.320971	-0.40064	-0.498032	-0.449773	-0.165444	0.327943	0.214937	0.102705	0.0959713
Hoffman et al. 2017	ODP1020	North Pacific	41	-126.43	Alkenones	-1.33983	0.0530281	1.44588	1.98155	2.51722		1.20423	-0.673593	-0.071422	-0.379324	0.721805	0.322928	-0.411489	0.343356	0.26718	0.706313	-0.190697	0.021523	-0.107093	-0.0172627	0.273098	-0.0907708	0.184665	0.123732
Hoffman et al. 2017	MD95-2040	North Atlantic	40.58	-9.87	Alkenones	-5.15583	-2.57705	0.00172654	2.35137	4.70101		1.13943	0.511616	-0.0418936	0.130719	0.793926	0.993852	-0.0617778	0.117518	0.23796	0.547994	-0.496589	-0.992178	-0.234221	-0.130367	-0.578744	0.100316	0.02289	0.121203
Brewer et al. 2008	La Grande Pile	Europe	47.73	6.5	pollen			3.46976
Brewer et al. 2008	Imbramowice	Europe	50.89	16.58	pollen			2.88559
Brewer et al. 2008	Eurach	Europe	47.78	11.31	pollen			-1.14794
Brewer et al. 2008	Jammertal	Europe	48.06	9.53	pollen			3.98211
Brewer et al. 2008	Samerberg	Europe	47.75	12.2	pollen			-1.90359
Brewer et al. 2008	Les Echets	Europe	45.83	5	pollen			0.297717
Brewer et al. 2008	Lago Grande di Monticchio	Europe	40.94	15.6	pollen			0.518029
