# Supplementary material for: Large-scale features of Last Interglacial climate: results from evaluating the lig127k simulations for the Coupled Model Intercomparison Project (CMIP6)–Paleoclimate Modeling Intercomparison Project (PMIP4)
Source: Copernicus journal article supplement (doi:10.5194/cp-17-63-2021), 2021-01-11
Supplement: Supplementary file 3 [file Table S3. Annual - Low latitudes (40S-40N)_CP-2019-174.xlsx]

## Sheet: Sheet1
	Table S3. Low latitudes (40S-40N) Annual
Compilation reference	Site Name	Latitude	Longitude	Proxy	Anom-2SD	Anom-1SD	Anom	Anom+1SD	Anom+2SD		ACCESS-ESM1-5	AWI-ESM-1-1-LR	AWI-ESM-2-1-LR	CESM2	CNRM-CM6-1	EC-Earth3-LR	FGOALS-f3-L	FGOALS-g3	GISS-E2-1-G	HadGEM3-GC31-LL	INM-CM4-8	IPSL-CM6A-LR	MIROC-ES2L	MPI-ESM1-2-LR	NESM3	NorESM1-F	NorESM2-LM	MMM
Hoffman et al. 2017	ODP662	-1.38	-11.74	Alkenones	-0.543528	0.210058	0.963645	1.7836	2.60356		-0.203798	-0.445673	-0.462612	-0.468615	0.193346	-0.00746371	-0.793202	-0.40546	-0.335222	-0.0555189	-0.0488306	-0.218947	-0.84875	-0.367485	-0.182526	-0.407016	-0.196394	-0.309069
Hoffman et al. 2017	GeoB1105	-1.67	-12.43	Alkenones	0.151969	1.00748	1.86298	2.77087	3.67876		-0.220725	-0.438142	-0.448826	-0.470062	0.184821	-0.00690364	-0.798613	-0.407866	-0.332324	-0.0660551	-0.0576979	-0.234975	-0.849617	-0.368499	-0.178411	-0.42513	-0.188874	-0.312229
Hoffman et al. 2017	GeoB1105	-1.67	-12.43	Mg/Ca	-2.20516	-1.3084	-0.411637	0.520939	1.45351		-0.220725	-0.438142	-0.448826	-0.470062	0.184821	-0.00690364	-0.798613	-0.407866	-0.332324	-0.0660551	-0.0576979	-0.234975	-0.849617	-0.368499	-0.178411	-0.42513	-0.188874	-0.312229
Hoffman et al. 2017	GeoB1112	-5.77	-10.74	Forams	-3.38473	-1.71464	-0.044545	1.29339	2.63132		-0.518572	-0.429621	-0.57354	-0.635705	-0.15	-0.413118	-0.82752	-0.497507	-0.470293	-0.418026	-0.135858	-0.608115	-1.02235	-0.402834	-0.153035	-0.588875	-0.611617	-0.497446
Hoffman et al. 2017	GeoB1112	-5.77	-10.74	Mg/Ca	-1.33027	-0.478696	0.372874	1.30916	2.24546		-0.518572	-0.429621	-0.57354	-0.635705	-0.15	-0.413118	-0.82752	-0.497507	-0.470293	-0.418026	-0.135858	-0.608115	-1.02235	-0.402834	-0.153035	-0.588875	-0.611617	-0.497446
Hoffman et al. 2017	GeoB1711-4	-23.31	12.38	Alkenones	1.05198	2.14956	3.24713	3.99378	4.74043		-0.368997	0.145026	-0.0873624	-0.39238	0.0380634	-0.43653	-0.649986	-0.0828613	-0.416369	-0.640252	-0.170134	-0.734227	-0.473273	0.578358	0.619118	-0.458638	-0.77539	-0.253284
Hoffman et al. 2017	GeoB1710-3	-23.43	11.7	Alkenones	1.02823	2.01994	3.01165	3.70473	4.39781		-0.429057	0.0819073	-0.185689	-0.38169	-0.0118381	-0.446174	-0.649364	-0.0695293	-0.444942	-0.618592	-0.159389	-0.747519	-0.467693	0.458509	0.60629	-0.516504	-0.762837	-0.279065
Hoffman et al. 2017	MD96-2080	-36.32	19.47	Mg/Ca	4.6514	5.40905	6.16669	7.06522	7.96374		-0.360817	-0.227921	-0.258569	-0.245587	0.216636	-0.144051	-0.544136	-0.17733	-0.270793	-0.138513	-0.18498	-0.628483	-1.28719	-0.230414	0.407705	-0.479922	-0.366198	-0.289445
Hoffman et al. 2017	V22-174	-10.07	-12.82	Coccolithophore	-3.83729	-2.25038	-0.663473	0.964489	2.59245		-0.463319	-0.349009	-0.483781	-0.66514	-0.0452382	-0.467827	-0.652212	-0.387441	-0.51042	-0.454474	-0.0132875	-0.786006	-0.987876	-0.347593	-0.123407	-0.745557	-0.606421	-0.475824
Hoffman et al. 2017	RC13-228	-22.33	11.2	Forams	-8.17488	-6.56194	-4.949	-2.50978	-0.0705617		-0.436629	0.0530086	-0.141991	-0.404154	0.0585199	-0.427401	-0.693449	-0.085145	-0.449555	-0.628378	-0.124754	-0.800195	-0.425661	0.555288	0.546506	-0.464296	-0.733701	-0.270705
Hoffman et al. 2017	RC13-228	-22.33	11.2	Coccolithophore	-2.23832	-0.678173	0.881973	2.71332	4.54467		-0.436629	0.0530086	-0.141991	-0.404154	0.0585199	-0.427401	-0.693449	-0.085145	-0.449555	-0.628378	-0.124754	-0.800195	-0.425661	0.555288	0.546506	-0.464296	-0.733701	-0.270705
Hoffman et al. 2017	RC13-228	-22.33	11.2	Radiolaria	-0.193715	1.19066	2.57503	4.0147	5.45437		-0.436629	0.0530086	-0.141991	-0.404154	0.0585199	-0.427401	-0.693449	-0.085145	-0.449555	-0.628378	-0.124754	-0.800195	-0.425661	0.555288	0.546506	-0.464296	-0.733701	-0.270705
Hoffman et al. 2017	RC13-229	-25.5	11.3	Forams	-3.12468	-1.73448	-0.344291	0.835299	2.01489		-0.392956	0.0306544	-0.229567	-0.315649	0.0342014	-0.423503	-0.564584	-0.099675	-0.427028	-0.486777	-0.126288	-0.646644	-0.627724	0.287869	0.711711	-0.571448	-0.77329	-0.271806
Hoffman et al. 2017	RC13-229	-25.5	11.3	Radiolaria	-0.0219342	1.19644	2.41482	3.61239	4.80996		-0.392956	0.0306544	-0.229567	-0.315649	0.0342014	-0.423503	-0.564584	-0.099675	-0.427028	-0.486777	-0.126288	-0.646644	-0.627724	0.287869	0.711711	-0.571448	-0.77329	-0.271806
Hoffman et al. 2017	RC11-86	-35.78	18.45	Forams	-2.59297	-1.53881	-0.484643	0.680295	1.84523		-0.347911	-0.206721	-0.327489	-0.226674	0.204947	-0.101247	-0.519995	-0.154259	-0.267045	-0.0924286	0.0877372	-0.599165	-1.23246	-0.243307	0.369378	-0.462671	-0.32692	-0.261543
Hoffman et al. 2017	RC11-86	-35.78	18.45	Coccolithophore	0.530642	2.10244	3.67425	5.31757	6.96089		-0.347911	-0.206721	-0.327489	-0.226674	0.204947	-0.101247	-0.519995	-0.154259	-0.267045	-0.0924286	0.0877372	-0.599165	-1.23246	-0.243307	0.369378	-0.462671	-0.32692	-0.261543
Hoffman et al. 2017	RC12-294	-37.27	-10.1	Forams	-1.59827	0.105086	1.80844	3.50738	5.20632		-0.268202	-0.437979	0.117134	-0.158322	0.267868	-0.24458	-0.643733	0.041952	-0.314965	0.0719973	-0.0890792	-0.360087	-1.33546	-0.133804	0.37509	-0.699795	-0.14506	-0.232766
Hoffman et al. 2017	RC12-294	-37.27	-10.1	Coccolithophore	-0.842351	0.869761	2.58187	4.25715	5.93243		-0.268202	-0.437979	0.117134	-0.158322	0.267868	-0.24458	-0.643733	0.041952	-0.314965	0.0719973	-0.0890792	-0.360087	-1.33546	-0.133804	0.37509	-0.699795	-0.14506	-0.232766
Hoffman et al. 2017	GeoB10038-4	-5.94	103.25	Mg/Ca	-2.3	-1.4	-0.5	0.55	1.6		-0.325588	-0.242493	-0.0113004	-0.305787	0.0968682	-0.278398	-0.627132	-0.123861	-0.355166	-0.0416228	-0.188212	-0.635963	-0.654962	-0.260331	-0.37433	-0.377093	-0.301996	-0.294551
Hoffman et al. 2017	GeoB10038-4	-5.94	103.25	Alkenones	-2.4	-1.65	-0.9	-0.1	0.7		-0.325588	-0.242493	-0.0113004	-0.305787	0.0968682	-0.278398	-0.627132	-0.123861	-0.355166	-0.0416228	-0.188212	-0.635963	-0.654962	-0.260331	-0.37433	-0.377093	-0.301996	-0.294551
Hoffman et al. 2017	MD01-2378	-13.08	121.79	Mg/Ca	-1.5	-0.4	0.7	1.65	2.6		0.549223	0.0747138	0.065038	0.301502	0.919331	0.565839	0.14747	0.450528	0.332536	0.807578	0.256832	0.225816	-0.137623	0.431591	0.761635	0.362206	0.296839	0.377121
Hoffman et al. 2017	V34-88	16.52	59.53	Forams	-2.8262	-1.75827	-0.690348	0.511348	1.71305		-0.610701	-0.222419	0.124138	-0.655945	-0.562046	-0.348471	-0.882617	-0.995221	-0.835494	0.0655821	-0.141162	-0.818675	-0.960407	0.0306794	-0.345449	-0.675866	-0.46128	-0.487962
Hoffman et al. 2017	RC12-339	9.13	90.03	Forams	-3.24849	-2.19949	-1.1505	-0.146536	0.857426		-0.771917	-0.19094	-0.161293	-0.627882	0.00227589	-0.269976	-0.675641	-0.540302	-0.727372	-0.0784357	-0.304391	-0.580599	-0.753369	-0.596725	-0.325347	-0.988964	-0.844026	-0.496171
Hoffman et al. 2017	V28-345	-17.67	117.95	Forams	-2.44718	-1.33223	-0.217274	0.879153	1.97558		0.524486	0.22009	0.217979	0.442744	0.911627	0.861963	0.114865	0.533768	0.347258	0.772027	0.458819	0.254271	-0.0953092	0.574508	0.813502	0.45169	0.446679	0.461822
Hoffman et al. 2017	ODP1018	36.99	-123.27	Alkenones	-2.82613	-0.366392	2.09334	4.97053	7.84773		0.848975	-0.710549	0.259664	-0.319063	1.06242	0.150088	-0.458231	0.287284	0.466078	0.825769	-0.168267	0.0856005	0.552457	0.0106795	-0.0927325	-0.117089	0.396161	0.181132
Hoffman et al. 2017	MD01-2421	36.02	141.78	Alkenones	1.98614	2.74489	3.50364	4.22159	4.93954		-0.163571	-1.36188	-0.839287	-0.367499	-0.467435	0.0429261	-1.3654	-0.40908	-0.724405	0.4353	-0.560322	-0.930289	-0.837803	-0.657894	-1.41252	-0.721172	-0.775429	-0.653868
Hoffman et al. 2017	ODP893	34.28	-120.03	Alkenones	1.69485	2.56293	3.43101	4.27674	5.12247		0.844177	-0.598688	0.419017	-0.0870366	1.45757	0.51028	-0.405131	0.614692	0.753259	1.14809	-0.291536	0.133515	0.487182	0.215831	-0.165057	-0.260893	0.481026	0.309194
Hoffman et al. 2017	ODP1014A	32.8	-118.9	Alkenones	0.0855956	1.5277	2.9698	3.63659	4.30338		0.701281	-0.760221	0.20166	-0.10808	1.36266	0.518758	-0.444628	0.484832	0.699275	1.05284	-0.353105	0.0892473	0.197109	-0.0296923	-0.581371	-0.3263	0.299914	0.176717
Hoffman et al. 2017	ODP1012	32.28	-118.38	Alkenones	0.865754	2.01338	3.16101	3.8763	4.59159		0.701281	-0.760221	0.20166	-0.10808	1.36266	0.518758	-0.444628	0.484832	0.699275	1.05284	-0.353105	0.0892473	0.197109	-0.0296923	-0.581371	-0.3263	0.299914	0.176717
Hoffman et al. 2017	LAPAZ21	22.98	-109.47	Alkenones	0.949611	1.74193	2.53424	3.34216	4.15007		0.783634	-0.353415	0.263948	-0.010276	-0.002442	-0.104859	-0.243504	0.106748	0.148156	0.606463	-0.531165	-0.316175	-0.59876	-0.0366893	-0.347456	-0.0388489	-0.221249	-0.0526993
Hoffman et al. 2017	ODP1145	19.53	117.63	Mg/Ca	-3.46721	-2.4925	-1.5178	-0.539614	0.438571		-0.30087	-0.759953	-0.617416	-0.369267	-0.0241534	-0.135209	-0.724963	-0.786127	-0.470232	0.0384567	-0.394866	-0.70339	-1.25528	-0.50739	-0.190475	-0.640216	-0.7178	-0.50348
Hoffman et al. 2017	ODP1146	19.45	116.27	Alkenones	-1.53538	-0.598902	0.337572	1.14376	1.94994		-0.361576	-0.765773	-0.663384	-0.427768	-0.0162049	-0.132021	-0.761578	-0.857718	-0.507287	0.00378726	-0.445245	-0.711777	-1.28225	-0.555266	-0.236076	-0.717083	-0.784464	-0.542452
Hoffman et al. 2017	MD97-2151	8.73	109.87	Alkenones	-1.44234	-0.491398	0.459543	1.35942	2.25929		-0.366425	0.154997	-0.0480117	-0.406467	0.530997	0.107192	-0.523604	-0.576959	-0.113902	0.0999408	-0.372338	-0.123886	-0.728692	0.019648	0.132017	-0.422253	-0.436524	-0.180839
Hoffman et al. 2017	GIK17961-2	8.5	112.33	Alkenones	-0.77369	-0.0278446	0.718001	1.48892	2.25984		-0.0617605	-0.00849769	-0.115785	-0.255722	0.596499	0.204818	-0.450269	-0.32979	-0.0596355	0.297193	-0.336614	-0.0641984	-0.665284	0.0406101	0.227301	-0.333947	-0.344566	-0.0976263
Hoffman et al. 2017	W8402A	0.95	-138.95	Alkenones	-0.272571	0.463202	1.19897	2.00902	2.81906		-0.346908	-0.730015	-0.747336	-0.553886	-0.100438	-0.237996	-0.667715	-0.238925	-0.54152	-0.16386	-0.839369	-0.417061	-1.28164	-0.727522	-0.0836443	-0.355358	-0.619133	-0.508961
Hoffman et al. 2017	TR163-22	0.5	-92.4	Mg/Ca	-3.22723	-2.33845	-1.44967	-0.441645	0.566382		-0.238118	-0.228486	-0.921064	-0.162359	0.248401	0.265702	-0.519633	0.192602	-0.333925	0.393302	0.120051	-0.349715	-0.811741	-0.0137413	0.374336	0.0724508	0.181992	-0.101761
Hoffman et al. 2017	ODP846	-3.08	-90.82	Alkenones	-1.11384	-0.250659	0.612524	1.48822	2.36391		-0.20643	0.0878464	-0.628367	-0.126493	0.332451	0.165065	-0.302277	0.0667523	-0.289227	0.328326	-0.174779	-0.553539	-0.83275	-0.0808229	0.362761	-0.0416506	-0.233866	-0.125118
Hoffman et al. 2017	V19-29	-3.57	-83.22	Forams	-4.0931	-2.67088	-1.24866	0.118291	1.48524		-0.183046	0.355839	-0.766662	-0.169908	0.348888	0.184214	-0.387946	0.203323	-0.370982	0.413557	0.00731142	-0.541497	-0.987888	-0.297357	0.296872	-0.407608	-0.40662	-0.159383
Hoffman et al. 2017	MD06-3018	-23	166.13	Mg/Ca	1.80115	2.64218	3.48321	4.461	5.43879		-0.220843	0.202874	-0.0346876	-0.194517	0.461854	0.195857	-0.340024	0.152178	-0.0672292	0.461308	0.179031	-0.127967	-0.0252572	0.581982	0.829532	-0.0367175	-0.138426	0.110526
Hoffman et al. 2017	V28-238	1.02	160.48	Forams	-2.68967	-1.5478	-0.405925	0.805989	2.0179		-0.172435	-0.518805	-0.610311	-0.417051	0.128	-0.0814037	-0.31454	-0.11542	-0.396816	-0.0549724	-0.34947	-0.473415	-0.61113	-0.757407	0.121005	-0.353185	-0.316919	-0.311428
Hoffman et al. 2017	Y71-6-12	-16.45	-77.57	Radiolaria	-3.74455	-1.34326	1.05804	3.18285	5.30767		-0.387374	-0.366211	-0.701436	-0.156329	-0.138843	-0.842851	-0.384763	0.0709235	-0.395985	-0.000279207	-0.339744	-0.815764	-0.716624	-0.770013	-0.514088	-0.245716	-0.45362	-0.421101
Hoffman et al. 2017	MD01-2444	37.57	-10.13	Alkenones	-3.2	-0.35	2.5	3.5	4.5		1.06998	0.39259	0.00201992	-0.216748	0.724236	0.792548	-0.144002	-0.0181583	0.117246	0.329242	-0.615062	-1.12223	-0.104232	-0.235981	-0.57273	-0.168114	-0.274043	-0.00255513
Hoffman et al. 2017	MD01-2444	37.57	-10.13	Mg/Ca	1.92817	2.95345	3.97874	5.00269	6.02665		1.06998	0.39259	0.00201992	-0.216748	0.724236	0.792548	-0.144002	-0.0181583	0.117246	0.329242	-0.615062	-1.12223	-0.104232	-0.235981	-0.57273	-0.168114	-0.274043	-0.00255513
Hoffman et al. 2017	MD02-2575	29	-87.11	Mg/Ca	1.20642	2.21405	3.22167	4.16556	5.10945		0.340589	0.169086	0.482968	-0.218681	0.433254	0.540172	-0.543469	-0.230784	-0.0458139	0.378554	-0.323697	-0.0250274	0.0692933	0.322801	-1.092	0.0738934	0.0498809	0.0224126
Hoffman et al. 2017	M35027-1	17.64	-67.17	Forams	-3.98268	-2.81012	-1.63755	-0.584078	0.469399		0.417849	-0.271976	-0.00132646	-0.164257	0.441395	0.371147	-0.287947	-0.135089	-0.0607584	0.646145	-0.13357	-0.0272938	-0.217604	-0.168278	-0.182801	0.100822	0.0405937	0.0215911
Hoffman et al. 2017	MD03-2707	2.5	9.39	Mg/Ca	-2.52967	-1.64837	-0.767081	0.207333	1.18175		0.0379196	-0.27413	-0.148057	-0.309941	0.00738436	-0.0598076	-0.422965	0.0141142	-0.498686	-0.165545	-0.18262	-0.447186	-0.730219	-0.172434	-0.543822	-0.384539	-0.271259	-0.267753
Hoffman et al. 2017	GIK15637-1	27	-18.98	Forams	-1.77779	-0.880875	0.0160372	0.934145	1.85225		0.380605	0.191757	0.0387134	-0.377109	0.835011	0.943576	-0.289616	-0.422253	0.21707	0.694041	0.452238	-0.332407	0.0316404	0.011587	-0.0653443	-0.27233	-0.481022	0.0915387
Hoffman et al. 2017	M12392-1	25.16	-16.85	Forams	-5.74517	-4.45292	-3.16068	-1.93758	-0.71448		0.110401	0.460034	0.256637	-0.435093	0.919235	0.853585	-0.53555	-0.61988	0.271252	0.557078	0.367289	-0.616762	-0.0337779	0.520335	0.532992	-0.628365	-0.580795	0.0822714
Hoffman et al. 2017	TR126-29	21.33	-93.95	Forams	-3.00209	-2.12003	-1.23797	-0.377059	0.483856		0.207622	-0.469047	-0.0347798	-0.242154	0.335932	0.201309	-0.297653	-0.0829389	-0.179522	0.261571	-0.0473405	-0.139788	0.131602	-0.0975435	-0.157291	0.109586	-0.0814398	-0.034228
Hoffman et al. 2017	TR126-23	20.48	-95.62	Forams	-2.89693	-1.96566	-1.03438	-0.164408	0.705566		0.237912	-0.513051	-0.100603	-0.339362	0.295735	0.226289	-0.402783	-0.148656	-0.226241	0.351108	0.186452	-0.140374	-0.0974177	-0.0440782	-0.253505	0.118753	-0.0520728	-0.0530528
Hoffman et al. 2017	V22-196	13.83	-18.97	Forams	-5.47254	-2.66624	0.140068	1.47046	2.80086		-0.618086	-1.26736	0.0290311	-0.851737	0.0372845	-0.0938732	-0.620777	-0.586559	-0.262857	1.0275	0.322994	-0.797507	-1.31845	0.171694	-0.734824	-0.840963	-1.24982	-0.450253
Hoffman et al. 2017	V28-127	11.65	-80.13	Forams	-2.54771	-1.38381	-0.21992	1.022	2.26393		-0.0155174	-0.204899	-0.00890951	-0.350337	0.297801	0.204499	-0.513831	-0.622429	-0.276445	0.429677	-0.0700615	-0.395751	-0.371464	-0.227098	-0.29068	-0.135664	-0.192166	-0.161369
Hoffman et al. 2017	V25-59	1.37	-33.48	Forams	-2.86384	-1.87929	-0.89474	0.155259	1.20526		-0.389268	-0.146864	-0.167342	-0.475609	0.0943291	0.0012698	-0.697933	-0.33306	-0.213044	0.19004	-0.0418455	-0.170202	-0.753256	-0.0686482	0.141663	-0.569506	-0.403301	-0.235446
