# Supplementary material for: Large-scale features of Last Interglacial climate: results from evaluating the lig127k simulations for the Coupled Model Intercomparison Project (CMIP6)–Paleoclimate Modeling Intercomparison Project (PMIP4)
Source: Copernicus journal article supplement (doi:10.5194/cp-17-63-2021), 2021-01-11
Supplement: Supplementary file 4 [file Table S4. Annual - SH Oceans and Antarctica (40-90S)_CP-2019-174.xlsx]

## Sheet: Sheet1
		Table S4. Annual - SH Oceans and Antarctica (40-90S)
Compilation reference		Core	Latitude	Longitude	Proxy	Location	Anom-2SD	Anom-1SD	Anom	Anom+1SD	Anom+2SD		ACCESS-ESM1-5	AWI-ESM-1-1-LR	AWI-ESM-2-1-LR	CESM2	CNRM-CM6-1	EC-Earth3-LR	FGOALS-f3-L	FGOALS-g3	GISS-E2-1-G	HadGEM3-GC31-LL	INM-CM4-8	IPSL-CM6A-LR	MIROC-ES2L	MPI-ESM1-2-LR	NESM3	NorESM1-F	NorESM2-LM	MMM
Capron et al. 2017	1	EDML	-75	0	Water isotopes	Antarctica	-2	-0.54	0.92	2.36	3.8		0.969987	0.498383	0.142338	0.40975	0.969641	-0.00632003	-0.457104	0.744572	-0.810069	0.52934	0.722876	0.449188	0.139001	0.631223	1.26246	-0.337593	0.26962	0.360429
Capron et al. 2017	2	EDC	-75.1	123.35	Water isotopes	Antarctica	-0.1	1.39	2.88	4.39	5.9		1.45426	0.559607	0.198386	0.0538479	0.866322	0.119123	-0.0452962	1.05722	-0.258114	0.629402	0.29703	0.203777	0.498689	0.456593	1.2294	0.530862	0.247645	0.476397
Capron et al. 2017	3	Dome F	-77.32	39.7	Water isotopes	Antarctica	0.2	1.73	3.26	4.83	6.4		1.49812	0.860588	0.711285	0.297246	1.31487	0.275011	0.322322	1.25339	-0.189491	1.10347	0.724513	0.438636	0.289528	0.886463	1.7533	0.577846	0.499034	0.742125
Capron et al. 2017	4	Vostok	-78.47	106.87	Water isotopes	Antarctica	-1	0.46	1.92	3.36	4.8		1.52744	0.643157	-0.0375231	0.186968	0.92349	0.00385022	-0.00160888	1.08221	0.142303	0.893596	0.268682	0.0677641	0.228854	0.384152	1.43276	0.166347	0.438626	0.49124
Capron et al. 2017	5	MD97-2121_B	-40.22	177.59	Alkenones	Pac Ocean	1.5	3.315	5.13	6.915	8.7		-0.305448	0.177154	-0.0900115	-0.110031	0.600856	0.277425	-0.218428	0.430419	0.0837326	0.346118	0.0851139	-0.0853006	-0.012992	0.480931	0.711696	-0.0373006	-0.130081	0.129638
Hoffman et al. 2017	6	MD97-2121	-40.38	177.98	Alkenones	Pac Ocean	5.22124	6.11983	7.01842	7.77811	8.53781		-0.305448	0.177154	-0.0900115	-0.110031	0.600856	0.277425	-0.218428	0.430419	0.0837326	0.346118	0.0851139	-0.0853006	-0.012992	0.480931	0.711696	-0.0373006	-0.130081	0.129638
Hoffman et al. 2017	7	RC15-61	-40.62	-77.2	Radiolaria	Pac Ocean	-6.89957	-5.32368	-3.74779	-2.29633	-0.84486		-0.213963	-0.350677	-0.415288	0.0116838	0.0223762	-0.178066	-0.354315	0.15065	-0.45567	0.126092	-0.508935	-0.261172	-0.400763	-0.464017	0.133293	-0.263619	-0.154599	-0.210411
Hoffman et al. 2017	8	ODP1089	-40.93	9.9	Alkenones	S. Atlantic	9.87847	10.6903	11.5022	12.5141	13.5261		-0.956698	-0.453318	-0.178227	-0.183423	0.299782	-0.287562	-0.861444	-0.196483	-0.377951	-0.198129	-0.15827	-0.820614	-0.90906	-0.369356	0.348267	-0.197533	-0.0889074	-0.32876
Hoffman et al. 2017	9	ODP1123	-41.79	-171.5	Forams	Pac Ocean	0.802913	2.82539	4.84787	6.93424	9.02061		0.226898	0.324671	0.115779	0.260111	0.756873	0.383464	0.154236	0.570445	0.124453	0.528952	-0.0639945	0.169889	0.0143545	0.716986	0.887685	0.323898	0.336293	0.343
Hoffman et al. 2017	10	PS2489-2	-42.9	8.97	Forams	S. Atlantic	-2.22428	-0.59822	1.02784	2.56269	4.09754		-0.731967	-0.488344	0.00237445	-0.0805885	0.38688	-0.211593	-0.857726	0.0228816	-0.377537	-0.122388	-0.223065	-0.65685	-1.06564	-0.197069	0.201345	0.0576551	-0.115275	-0.262171
Hoffman et al. 2017	11	MD73-25	-43.82	51.3	Radiolaria	Ind Ocean	-8.69629	-7.74373	-6.79117	-5.85161	-4.91204		-0.40541	-0.368343	-0.42119	-0.18599	0.416411	-0.482622	-0.812039	0.456979	-0.351766	-0.166964	-0.223225	-0.552877	-0.581803	-0.12464	0.102577	-0.48404	-0.106858	-0.252459
Hoffman et al. 2017	12	MD97-2106	-45.15	146.29	Forams	Pac Ocean	-1.07307	1.08189	3.23686	5.36865	7.50045		-0.154456	0.749671	0.0472029	0.285491	0.358573	-0.28038	-0.444612	0.770415	-0.206314	0.186516	0.0223132	-0.0882101	0.171225	0.662236	0.887034	-0.0285347	0.273736	0.188936
Hoffman et al. 2017	13	DSDP594	-45.5	174.95	Forams	Pac Ocean	-2.83951	-1.18904	0.461431	2.21374	3.96605		-0.203702	0.219977	-0.0867998	-0.172923	0.432416	-0.145281	-0.0853021	0.68498	-0.0364115	0.331875	-0.222982	0.0485958	0.384053	0.0365054	0.422468	-0.220291	-0.225077	0.0683588
Hoffman et al. 2017	14	MD97-2120	-45.52	174.93	Mg/Ca	Pac Ocean	6.07465	6.90226	7.72988	9.04988	10.3699		-0.203702	0.219977	-0.0867998	-0.172923	0.432416	-0.145281	-0.0853021	0.68498	-0.0364115	0.331875	-0.222982	0.0485958	0.384053	0.0365054	0.422468	-0.220291	-0.225077	0.0683588
Hoffman et al. 2017	15	MD88-770	-46.01	96.47	Diatoms	Ind Ocean	-0.214646	0.860018	1.93468	2.98756	4.04043		0.533418	0.469931	0.554831	0.128018	1.17321	0.106409	-0.293556	1.03914	-0.0355584	0.408589	0.51222	-0.0705031	0.0532346	0.607587	1.5494	0.0753127	-0.0204468	0.399485
Hoffman et al. 2017	16	Y9	-48.24	177.34	Forams	Pac Ocean	-0.232915	1.87507	3.98307	6.16905	8.35503		0.0872586	0.24659	-0.118659	0.0389337	0.390246	-0.177316	-0.00370529	0.872691	-0.0202184	0.406502	-0.318187	0.206505	0.488457	-0.0140981	0.336508	0.0305086	0.194627	0.155685
Hoffman et al. 2017	17	MD97-2108	-48.5	149.11	Forams	Pac Ocean	-2.68	-0.372536	1.93493	3.9552	5.97548		0.222268	0.444111	0.145683	0.483629	0.480911	-0.144503	-0.0772123	0.869146	-0.112503	0.257637	0.105891	0.0772428	0.334122	0.582008	0.563106	0.0792314	0.406752	0.277501
Hoffman et al. 2017	18	MD97-2109	-50.63	169.38	Forams	Pac Ocean	-6.03309	-3.69359	-1.35408	1.1157	3.58548		0.33098	0.253567	0.0155744	0.418257	0.437303	-0.0243968	0.0153811	0.831983	0.0103901	0.41395	-0.0277776	0.266866	0.482167	0.549084	0.4469	0.25996	0.397373	0.29868
