# Supplementary material for: Large-scale features of Last Interglacial climate: results from evaluating the lig127k simulations for the Coupled Model Intercomparison Project (CMIP6)–Paleoclimate Modeling Intercomparison Project (PMIP4)
Source: Copernicus journal article supplement (doi:10.5194/cp-17-63-2021), 2021-01-11
Supplement: Supplementary file 5 [file Table S5. JJA - NH Oceans (40-90N) JJA_CP-2019-174.xlsx]

## Sheet: Sheet1
	Table S5. NH Oceans (40-90N) JJA
Compilation reference	Core	Latitude	Longitude	Proxy	Location	Anom-2SD	Anom-1SD	Anom	Anom+1SD	Anom+2SD		ACCESS-ESM1-5	AWI-ESM-1-1-LR	AWI-ESM-2-1-LR	CESM2	CNRM-CM6-1	EC-Earth3-LR	FGOALS-f3-L	FGOALS-g3	GISS-E2-1-G	HadGEM3-GC31-LL	INM-CM4-8	IPSL-CM6A-LR	MIROC-ES2L	MPI-ESM1-2-LR	NESM3	NorESM1-F	NorESM2-LM	MMM
Capron et al. 2017	HM71-19	69.49	-9.52	Percentage of N. pachyderma sinistral	Norwegian Sea	-2.34	-0.395	1.55	3.495	5.44		2.22805	-0.152732	1.24019	1.6368	2.07952	7.4945	0.534257	2.17761	1.51216	4.79189	1.27051	1.88587	1.61733	1.57785	1.12176	1.11609	0.839846	1.9395
Capron et al. 2017	PS1243	69.37	-6.55	Percentage of N. pachyderma sinistral	Norwegian Sea	-2.54	-0.455	1.63	3.715	5.8		2.32276	-0.105573	1.10608	1.50227	2.11816	7.54987	0.436493	2.11402	1.65187	4.37564	1.23295	1.64449	1.30917	1.48076	1.28516	1.05058	0.781882	1.87392
Capron et al. 2017	HM57-7	68.43	-13.87	Percentage of N. pachyderma sinistral	Norwegian Sea	-1.63	-0.005	1.62	3.245	4.87		4.92516	-0.244244	1.47749	1.94638	2.46481	7.48589	0.781644	2.2663	1.374	5.63347	1.23289	1.94083	1.99039	1.67197	0.91552	1.47405	1.3079	2.2732
Capron et al. 2017	ODP644	66.67	4.57	Percentage of N. pachyderma sinistral	Norwegian Sea	-8.09	-6.18	-4.27	-2.36	-0.45		2.79196	0.0620512	0.68005	1.21907	2.66676	5.78093	0.777014	1.75676	1.68732	3.56839	0.848721	1.34767	1.15846	1.01273	-0.72001	0.891585	0.603699	1.53724
Capron et al. 2017	MD95-2009	62.74	-4	Foraminifera transfer function (MAT)	Norwegian Sea	-12.45	-10.59	-8.73	-6.87	-5.01		3.00109	0.221857	0.674445	1.25757	2.07758	5.02426	0.834276	2.05856	0.651452	3.21262	0.603706	0.626971	1.10354	1.09019	-1.34236	0.661428	0.997612	1.33852
Capron et al. 2017	ENAM33	61.265	-11.16	Foraminifera transfer function (WAPLS)	North Atlantic	-3.98	-2.46	-0.94	0.58	2.1		3.19497	0.511719	0.481905	1.27366	1.88418	4.58175	0.997577	1.86953	0.897337	2.77451	0.705806	0.38336	1.26876	1.02482	-1.5479	0.511746	0.881053	1.27616
Capron et al. 2017	EW9302-JPC8	61	-25	Foraminifera transfer function (MAT)	North Atlantic	3.1	4.385	5.67	6.955	8.24		3.85232	0.814431	0.3377	1.44839	2.10783	5.10641	0.945945	1.69436	0.985627	2.99283	0.723165	0.277379	1.87573	1.20327	0.67072	0.416614	1.02755	1.55766
Capron et al. 2017	MD95-2014	60.58	-22.07	Foraminifera transfer function (MAT)	North Atlantic	-0.38	1.135	2.65	4.165	5.68		3.52381	0.7494	0.100449	1.34691	2.23859	4.99883	0.87114	1.51598	1.06219	2.79706	0.682669	0.502691	1.25299	1.03634	-0.0166622	0.476002	0.923865	1.41543
Capron et al. 2017	MD99-2227	58.21	-48.37	Mg/Ca	Labrador Sea	-5.71	-4.545	-3.38	-2.215	-1.05		7.1797	0.933592	0.200966	2.32977	2.84634	8.39061	1.48972	3.42055	1.40175	3.75667	0.424865	1.18822	1.99247	1.13991	2.74162	1.27854	1.92283	2.50812
Capron et al. 2017	MD03-2664_MAT	57.44	-48.61	Foraminifera transfer function (MAT)	Labrador Sea	0.9	1.815	2.73	3.645	4.56		7.54151	0.955361	0.0874019	2.24632	2.86564	8.4761	1.35377	3.05768	1.32744	3.55235	0.251561	1.04957	1.86248	1.08109	2.6088	0.9664	1.6859	2.40996
Capron et al. 2017	MD03-2664_MgCa	57.44	-48.61	Mg/Ca	Labrador Sea	-4.32	-2.745	-1.17	0.405	1.98		7.54151	0.955361	0.0874019	2.24632	2.86564	8.4761	1.35377	3.05768	1.32744	3.55235	0.251561	1.04957	1.86248	1.08109	2.6088	0.9664	1.6859	2.40996
Capron et al. 2017	ODP 980	55.8	-14.11	Foraminifera transfer function (MAT)	North Atlantic	-2.42	-0.735	0.95	2.635	4.32		3.00795	0.717492	-0.00182867	0.942308	1.72104	4.17916	0.741631	1.14402	0.804732	2.32798	0.669888	0.495218	0.788504	0.654235	0.378452	0.62694	0.722543	1.17178
Capron et al. 2017	NA87-25	55.57	-14.75	Foraminifera transfer function (MAT)	North Atlantic	-1.1	0.175	1.45	2.725	4		3.00795	0.717492	-0.00182867	0.942308	1.72104	4.17916	0.741631	1.14402	0.804732	2.32798	0.669888	0.495218	0.788504	0.654235	0.378452	0.62694	0.722543	1.17178
Capron et al. 2017	M23414-9	53.54	-20.28	Foraminifera transfer function (MAT)	North Atlantic	-0.67	0.44	1.55	2.66	3.77		3.2443	1.43047	-0.460356	0.724131	1.81181	4.22257	0.756502	0.949022	0.972104	2.14384	0.457719	0.481948	0.666587	0.342759	0.566133	0.916903	0.618903	1.16737
Capron et al. 2017	NEAP18K	53	-30	Foraminifera transfer function (MAT)	North Atlantic	-0.94	0.305	1.55	2.795	4.04		3.06604	0.905246	-0.193591	1.13093	1.92109	6.37857	1.03687	1.09974	0.943749	2.6961	0.389728	0.300354	0.379192	0.393255	0.827434	0.835973	1.16605	1.36922
Capron et al. 2017	SU90-39	52.57	-21.94	Foraminifera transfer function (RAM)	North Atlantic	-1.59	-0.77	0.05	0.87	1.69		3.17436	1.6411	-0.548413	0.526237	1.72302	3.77591	0.790012	0.942469	0.985255	1.95102	0.432857	0.500206	0.565745	0.277396	0.771078	1.07403	0.596755	1.12818
Capron et al. 2017	SU90-44	50.02	-17.1	Foraminifera transfer function (RAM)	North Atlantic	1.68	2.31	2.94	3.57	4.2		2.76424	1.63494	-0.471609	0.311778	1.62586	3.66696	0.604835	0.936021	1.06016	1.88245	0.221151	0.968521	0.582073	0.267144	0.955134	0.99967	0.79849	1.10634
Capron et al. 2017	K708-1	50	-23.73	Foraminifera transfer function (F13B-4CE)	North Atlantic	-0.75	0.505	1.76	3.015	4.27		3.04621	1.57688	-0.548884	0.176862	1.57999	3.16862	0.800923	0.910387	1.02682	1.61272	0.0662062	0.518173	0.291025	0.162239	1.10557	1.233	0.565844	1.01721
Capron et al. 2017	EW9302-JPC2	48.8	-45.09	Percentage of N. pachyderma sinistral	Labrador Sea	-7.85	-5.43	-3.01	-0.59	1.83		3.68592	0.984211	0.375655	1.42042	2.87673	5.77222	0.180483	2.72268	0.912712	3.18213	0.122195	1.66654	0.0269028	0.657459	2.16933	1.14902	1.99804	1.75898
Capron et al. 2017	SU90-08_MAT	43.35	-30.41	Foraminifera transfer function (MAT)	North Atlantic	-1.42	0.11	1.64	3.17	4.7		2.16285	1.35445	0.153205	-0.0214085	2.12698	2.35621	0.495996	0.824794	1.50676	1.79333	0.0777887	1.07799	0.210536	0.0526957	1.579	1.71464	1.60854	1.12202
Capron et al. 2017	CH69-K09	41.76	-47.35	Foraminifera transfer function (MAT)	North Atlantic	-6.73	-4.745	-2.76	-0.775	1.21		1.99934	0.0444827	0.547466	0.896979	3.11974	2.17348	-0.261883	1.62394	1.6271	1.77902	-0.0918702	1.85934	-1.25025	-0.123949	2.53845	1.32646	2.18471	1.17603
Capron et al. 2017	V30-97	41	-32.93	Foraminifera transfer function (F13B-4CE)	North Atlantic	-3.14	-1.825	-0.51	0.805	2.12		2.16196	1.25468	0.214167	0.187632	2.53533	2.41439	0.543551	0.755752	1.6616	2.1918	0.371454	1.43492	0.392205	0.0827379	1.97293	1.7977	1.71671	1.27585
Capron et al. 2017	SU90-03	40.51	-32.05	Foraminifera transfer function (MAT)	North Atlantic	-1.18	-0.375	0.43	1.235	2.04		2.03406	1.14681	0.213375	0.268277	2.64945	2.50456	0.525815	0.71336	1.68252	2.31731	0.496645	1.37434	0.519074	0.0809403	2.06723	1.81782	1.60361	1.29501
Hoffman et al. 2017	MD95-2040	40.58	-9.87	Forams	North Atlantic	-9.26539	-5.74993	-2.23447	0.939078	4.11263		2.27546	1.68533	0.707812	1.5318	1.88732	2.01091	1.45275	1.06928	1.52736	1.29781	0.694852	0.259564	1.27599	0.399917	0.645531	1.99199	1.61202	1.31328
Hoffman et al. 2017	SU90-03	40.5	-32.05	Forams	North Atlantic	-2.5751	0.074001	2.7231	4.66482	6.60653		2.03406	1.14681	0.213375	0.268277	2.64945	2.50456	0.525815	0.71336	1.68252	2.31731	0.496645	1.37434	0.519074	0.0809403	2.06723	1.81782	1.60361	1.29501
Hoffman et al. 2017	Y7211-1	43.25	-126.38	Radiolaria	North Atlantic	-11.6	-9.15	-6.7	-4.25	-1.8		1.54279	0.0544075	0.145827	-0.0128041	1.92523	1.3833	0.225859	0.592321	0.895956	1.52092	0.32034	0.481753	0.354114	0.633469	1.57869	0.617505	0.995699	0.779728
