# Supplementary material for: Large-scale features of Last Interglacial climate: results from evaluating the lig127k simulations for the Coupled Model Intercomparison Project (CMIP6)–Paleoclimate Modeling Intercomparison Project (PMIP4)
Source: Copernicus journal article supplement (doi:10.5194/cp-17-63-2021), 2021-01-11
Supplement: Supplementary file 6 [file Table S6. JJA - NH terrestrial (40-90N) JJA__CP-2019-174.xlsx]

## Sheet: Sheet1
	Table S6. NH terrestrial (40-90N) Summer
Compilation reference	Site Name	Location	Latitude	Longitude	Proxy	Anom-2SD	Anom-1SD	Anom	Anom+1SD	Anom+2SD		ACCESS-ESM1-5	AWI-ESM-1-1-LR	AWI-ESM-2-1-LR	CESM2	CNRM-CM6-1	EC-Earth3-LR	FGOALS-f3-L	FGOALS-g3	GISS-E2-1-G	HadGEM3-GC31-LL	INM-CM4-8	IPSL-CM6A-LR	MIROC-ES2L	MPI-ESM1-2-LR	NESM3	NorESM1-F	NorESM2-LM	MMM
Brewer et al. 2008	La Grande Pile	Europe	47.73	6.5	pollen	0.910722	2.43486	3.959	5.48314	7.00728		7.6856	1.71092	3.38144	4.81498	4.07331	5.13538	4.16315	7.4855	3.55707	4.91951	5.12558	4.50456	3.39869	3.2451	3.99859	5.11793	5.17437	4.55833
Brewer et al. 2008	Imbramowice	Europe	50.89	16.58	pollen	0.380393	1.6676	2.95481	4.24202	5.52923		8.89988	1.90182	3.64267	5.70412	4.89674	5.4635	5.06674	8.53337	3.59865	5.30997	5.53297	5.91489	3.32184	3.18003	4.39814	5.72488	5.61822	5.1005
Brewer et al. 2008	Eurach	Europe	47.78	11.31	pollen	-3.1632	-1.11729	0.92862	2.97453	5.02044		6.45675	1.99611	3.60676	5.01907	4.03407	4.8993	4.19739	7.27246	3.7519	5.30084	5.5563	4.88692	3.3119	3.61313	4.37925	5.18367	5.45825	4.64259
Brewer et al. 2008	Jammertal	Europe	48.06	9.53	pollen	-0.0043037	1.83386	3.67202	5.51018	7.34834		7.33228	1.99745	3.55867	5.12189	4.30369	5.19006	4.39147	7.67273	3.63862	5.07051	5.40491	4.93235	3.21986	3.42152	4.2465	4.97943	5.43086	4.70075
Brewer et al. 2008	Samerberg	Europe	47.75	12.2	pollen	-2.62604	-1.11688	0.392283	1.90144	3.4106		6.428	1.90662	3.60997	5.24759	4.12817	4.92696	4.24633	7.29983	3.82298	5.35242	5.72022	4.66461	3.29422	3.52536	4.32665	5.20248	5.39539	4.65281
Brewer et al. 2008	Les Echets	Europe	45.83	5	pollen	-3.05397	-1.7691	-0.484234	0.800636	2.08551		8.10592	2.06845	4.0575	6.42934	4.02252	5.49926	4.27053	6.71801	3.81206	5.39357	5.06338	4.37861	3.54955	3.83765	4.64969	5.2989	5.80327	4.8799
Brewer et al. 2008	Lago Grande di Monticchio	Europe	40.94	15.6	pollen	-2.0359	-0.843857	0.348183	1.54022	2.73226		5.31244	3.162	2.74107	5.11489	5.00119	5.6005	3.78151	4.8026	3.77082	5.60709	4.95353	4.8922	3.48597	3.36704	3.85316	5.23239	5.32941	4.47105
Francis et al. 2006; Fréchette et al. 2006	Fog Lake	Canada	67.183	-63.25	pollen & chironomids	2.93627	4.43627	5.93627	7.43627	8.93627		1.05798	1.10877	1.24141	3.08675	3.8961	7.53072	1.88258	3.53003	3.33133	5.23625	2.59126	2.93868	2.80313	1.35444	1.79301	2.0778	2.90914	2.84526
Fréchette et al. 2006	Amarok Lake	Canada	66.267	-65.75	pollen	3.32962	4.12962	4.92962	5.72962	6.52962		2.05687	0.522198	0.853954	4.53849	4.74093	9.20044	2.92977	5.03459	3.38979	6.27893	2.14539	3.77549	2.95353	0.736285	0.843261	2.76301	3.71334	3.32213
Axford et al. 2011	Lake CF8	Canada	70.567	-68.95	chironomids	3.42777	4.95777	6.48777	8.01777	9.54777		1.30653	1.31882	1.38749	2.93786	4.1365	7.71162	1.88459	4.69249	2.89495	4.52685	2.04714	2.89557	2.40033	1.40243	1.56818	1.9242	2.80157	2.81395
McFarlin et al. 2018	Wax Lips Lake	Greenland	76.85	-66.967	chironomids	4.67567	6.20567	7.73567	9.26567	10.7957		2.85554	1.422	1.69059	3.11454	4.31185	10.162	2.1351	4.74466	2.70821	5.99991	1.31477	2.59833	1.12403	1.78053	1.90317	2.48645	3.27425	3.15447
Melles et al. 2012	El'gygytgyn	Siberia	67.5	172.083	pollen	-6.39692	-2.29692	1.80308	5.90308	10.0031		3.49466	2.10497	2.19437	4.4885	4.18074	4.24094	3.11041	5.7649	5.71202	4.85987	3.30178	4.32563	3.09474	2.19163	3.71174	2.89828	4.93152	3.8004
Plikk et al. 2019; Salonen et al. 2018	Sokli	Finland	67.8	29.3	pollen & chironomids	-2.5293	-0.4293	1.6707	3.7707	5.8707		4.28116	2.98958	3.70091	2.99292	4.62496	6.47747	3.57252	5.4425	4.65696	5.19633	2.4689	3.23321	3.26595	3.4966	3.33361	3.79457	2.54156	3.88645
Bigelow et al. 2014	Birch Creek	Alaska	65.817	-144.3	beetles	-2.9734	-1.9734	-0.9734	0.0266	1.0266		3.07576	1.30603	1.53275	2.91135	3.51685	2.93046	2.27441	4.45576	2.60384	4.30446	2.33599	3.20823	2.46474	1.9456	3.2678	1.93834	3.21338	2.78151
Bigelow et al. 2014	Koyukuk	Alaska	66.55	-152.083	beetles	-3.1809	-0.3809	2.4191	5.2191	8.0191		2.48794	1.2234	1.05064	2.51042	3.19118	2.61848	1.76048	4.12235	2.30722	4.01486	2.26993	3.11923	2.50583	1.22068	2.81651	1.46637	3.00904	2.45262
